# Supplementary material
Source: PubMed Central journal article supplement (PMC5902734)
Supplement: NIHMS940609-supplement-Data_Set_1.pdf [file NIHMS940609-supplement-Data_Set_1.pdf]

| offTarget Native crRNA    | peak_score | predicted_gRNA.name    | gRNAPlusPAM  | offTarget_sequences          | guideAlign |
|---------------------------|------------|------------------------|--------------|------------------------------|------------|
| chr20:+:32761950:32761972 | 924        | 1 293 site4 target     | GGCACTGCGGCT | (GGCACTGCGGCT.....           |            |
| chrX:-:105602031:10560205 | 643        | 0.381818 293 site4 OT1 | GGCACTGCGGCT | (AGCTCTGCGGCTA..T.....       |            |
| chr10:+:125006289:1250063 | 171        | 0.571429 293 site4 OT2 | GGCACTGCGGCT | (GGCACGACGGC'.....GA.....    |            |
| chr20:+:61435490:61435512 | 161        | 0.631579 293 site4 OT3 | GGCACTGCGGCT | (TGCACTGCGGCC T.....C...     |            |
| chr15:-:40752038:40752060 | 128        | 0.3125 293 site4 OT4   | GGCACTGCGGCT | (GGCGCTGCGGC'...G.....G..    |            |
| chr4:+:55949016:55949038  | 104        | 0.244898 293 site4 OT5 | GGCACTGCGGCT | (GGCAATGCGGC'.....A.....     |            |
| chr7:+:54493728:54493750  | 80         | 0.2925 293 site4 OT6   | GGCACTGCGGCT | (AGGACTGCGGC' A.G.....       |            |
| chr5:-:128925095:12892511 | 57         | 0.01634 293 site4      | GGCACTGCGGCT | (GGCAATATGGCT'....A.AT.....) |            |
| chr13:+:38688775:38688797 | 24         | 0.498462 293 site4     | GGCACTGCGGCT | (AGCAGTGCAGGC' A...G.....A   |            |
| chr13:-:88248731:88248753 | 22         | 0.38854 293 site4      | GGCACTGCGGCT | (CACACTGCAGCT CA.....A.....  |            |
| chr10:+:75343345:75343367 | 20         | 0.578512 293 site4     | GGCACTGCGGCT | (GGCATCACGGCT'....TCA.....   |            |
| chr17:-:77433192:77433214 | 15         | 0.717949 293 site4     | GGCACTGCGGCT | (GACACCACGGCT' A...CA.....   |            |
| chr19:-:32891169:32891191 | 15         | 0.212121 293 site4     | GGCACTGCGGCT | (GGCTCTGCGGCT'...T.....      |            |
| chr17:-:326505:326527     | 12         | 0.816667 293 site4     | GGCACTGCGGCT | (TGCACTGTGGCT' T.....T.....  |            |
| chr12:-:104694246:1046942 | 4          | 0.026886 293 site4     | GGCACTGCGGCT | (TGGACTGCGGC' T.G.....       |            |
| chr6:-:160096843:16009686 | 5          | 0.346667 293 site4     | GGCACTGCGGCT | (GGCACTGCTGCT'.....T.....G   |            |
| chr4:-:150443895:15044391 | 6          | 0 293 site4            | GGCACTGCGGCT | (GTCAGTTTGGTT' .T..G.TT..T.  |            |
| chr13:-:27055267:27055289 | 9          | 0.197802 293 site4     | GGCACTGCGGCT | (GGCACTGGGGT'.....G..T....   |            |

| offTarget 10DNA           | peak_score | predicted_gRNA.name | gRNAPlusPAM  | offTarget_sequences        | guideAlign |
|---------------------------|------------|---------------------|--------------|----------------------------|------------|
| chr20:+:32761950:32761972 | 518        | 1 293 site4 target  | GGCACTGCGGCT | (GGCACTGCGGCT.....         |            |
| chr11:-:125388836:1253888 | 4          | 0 293 site4         | GGCACTGCGGCT | (GGTGTGTGGG' /..TG...T..G/ |            |

| offTargetS | mismatch.   | n.PAM.mis | n.guide.mi | PAM.sequ | offTarget_S | offTarget_E | chromoso | inExon | entrez_id |
|------------|-------------|-----------|------------|----------|-------------|-------------|----------|--------|-----------|
| +          |             | 0         | 0          | GGG      | 32761950    | 32761972    | chr20    |        |           |
| -          | 20,17,3     | 0         | 3          | GGG      | 105602031   | 105602053   | chrX     |        | 26280     |
| +          | 15,14       | 0         | 2          | GGG      | 125006289   | 125006311   | chr10    |        | 1488      |
| +          | 20,9,3      | 0         | 3          | TGG      | 61435490    | 61435512    | chr20    |        |           |
| -          | 17,9        | 0         | 2          | AGG      | 40752038    | 40752060    | chr15    | TRUE   | 55177     |
| +          | 16,3        | 0         | 2          | AGG      | 55949016    | 55949038    | chr4     | TRUE   | 9662      |
| +          | 20,18,6     | 0         | 3          | TGG      | 54493728    | 54493750    | chr7     |        |           |
| -          | 16,14,13,7  | 1         | 6          | GAG      | 128925095   | 128925117   | chr5     |        | 28965     |
| +          | 20,16,8     | 0         | 3          | TGG      | 38688775    | 38688797    | chr13    | TRUE   | 341640    |
| -          | 20,19,12    | 0         | 3          | TGG      | 88248731    | 88248753    | chr13    |        |           |
| +          | 16,15,14    | 0         | 3          | AGG      | 75343345    | 75343367    | chr10    |        | 84858     |
| -          | 19,15,14,4  | 0         | 4          | TGG      | 77433192    | 77433214    | chr17    |        | 10801     |
| -          | 17,3        | 0         | 2          | TGG      | 32891169    | 32891191    | chr19    |        | 84902     |
| -          | 20,13,4     | 0         | 3          | GGG      | 326505      | 326527      | chr17    |        |           |
| -          | 20,18,4,3,2 | 1         | 5          | GAG      | 104694246   | 104694268   | chr12    |        | 50515     |
| -          | 12,6        | 0         | 2          | TGG      | 160096843   | 160096865   | chr6     |        | 3482      |
| -          | 19,16,14,1  | 2         | 5          | CTT      | 150443895   | 150443917   | chr4     |        | 987       |
| -          | 13,10       | 0         | 2          | GGG      | 27055267    | 27055289    | chr13    |        |           |

| offTargetS | mismatch.  | n.PAM.mis | n.guide.mi | PAM.sequ | offTarget_S | offTarget_E | chromoso | inExon | entrez_id |
|------------|------------|-----------|------------|----------|-------------|-------------|----------|--------|-----------|
| +          |            | 0         | 0          | GGG      | 32761950    | 32761972    | chr20    |        |           |
| -          | 18,17,13,1 | 2         | 6          | CTA      | 125388836   | 125388858   | chr11    |        | 63876     |

symbol

IL1RAPL2  
CTBP2

RMDN3  
CEP135

SLC27A6  
FREM2

ZNF503  
9-Sep  
CEP89

CHST11  
IGF2R  
LRBA

symbol

PKNOX2
