# Supplementary material
Source: PubMed Central journal article supplement (PMC5902734)
Supplement: NIHMS940609-supplement-Tables_1-2_Figures_1-6.pdf [file NIHMS940609-supplement-Tables_1-2_Figures_1-6.pdf]

## Supplementary Information

**Supplementary Table 1** All oligonucleotides sequences used in this study

**Supplementary Table 2** Primer sequences

**Supplementary Figure 1**

**Supplementary Figure 2**

**Supplementary Figure 3**

**Supplementary Figure 4**

**Supplementary Figure 5**

**Supplementary Figure 6**

**Supplementary Data Set 1** Details of GUIDE-Seq analysis of native and 10 DNA crRNAs of three endogenous genes (Excel file)

### Supplementary Table 1. All oligonucleotides sequences used in this study

DNA nucleotides are in uppercase (A, T, C, G). RNA nucleotides are described as r plus uppercase (rA, rU, rC, rG)

| Name              | Sequence (5' to 3')                                                                  | Note                                                                            |
|-------------------|--------------------------------------------------------------------------------------|---------------------------------------------------------------------------------|
| GFP-Native Strand | rGrGrGrCrGrArGrGrArGrCrUrGrUrUrCrArCrCrGrGrUrUrUrUrArGrArGrCrUrArUrGrCrUrGrUrUrUrUrG | crRNA without any modifications                                                 |
| GFP-2DNA          | GGrGrCrGrArGrGrArGrCrUrGrUrUrCrArCr rCrGrGrUrUrUrUrArGrArGrCrUrArUrGrCrUrGrUrUrUrUrG | Substitutes 2 RNA nucleotides with DNA nucleotides at 5' end of guide sequence  |
| GFP-4DNA          | GGGCrGrArGrGrArGrCrUrGrUrUrCrArCrCrGrGrUrUrUrUrArGrArGrCrUrArUrGrCrUrGrUrUrUrUrG     | Substitutes 4 RNA nucleotides with DNA nucleotides at 5' end of guide sequence  |
| GFP-6DNA          | GGGCGArGrGrArGrCrUrGrUrUrCrArCrCr rGrGrUrUrUrUrArGrArGrCrUrArUrGrCrUrGrUrUrUrUrG     | Substitutes 6 RNA nucleotides with DNA nucleotides at 5' end of guide sequence  |
| GFP-8DNA          | GGGCGAGGrArGrCrUrGrUrUrCrArCrCrGrGrUrUrUrUrArGrArGrCrUrArUrGrCrUrGrUrUrUrUrG         | Substitutes 8 RNA nucleotides with DNA nucleotides at 5' end of guide sequence  |
| GFP-10DNA         | GGGCGAGGAGrCrUrGrUrUrCrArCrCrGrGrUrUrUrUrArGrArGrCrUrArUrGrCrUrGrUrUrUrUrG           | Substitutes 10 RNA nucleotides with DNA nucleotides at 5' end of guide sequence |
| GFP-12DNA         | GGGCGAGGAGCTrGrUrUrCrArCrCrGrGr rUrUrUrUrArGrArGrCrUrArUrGrCrUrGrUrUrUrUrG           | Substitutes 12 RNA nucleotides with DNA nucleotides at 5' end of guide sequence |
| GFP-14DNA         | GGGCGAGGAGCTGTUrCrArCrCrGrGrUrUrUrUrArGrArGrCrUrArUrGrCrUrGrUrUrUrUrG                | Substitutes 14 RNA nucleotides with DNA nucleotides at 5' end of                |

|                    |                                                                                      |                                                                                 |
|--------------------|--------------------------------------------------------------------------------------|---------------------------------------------------------------------------------|
|                    | UrUrUrG                                                                              | guide sequence                                                                  |
| GFP-16DNA          | GGGCGAGGAGCTGTTCrArCrCrGrGrUrUrUrUrArGrArGrCrUrArUrGrCrUrGrUrUrUrG                   | Substitutes 16 RNA nucleotides with DNA nucleotides at 5' end of guide sequence |
| GFP-18DNA          | GGGCGAGGAGCTGTTCACrCrGrGrUrUrUrUrArGrArGrCrUrArUrGrCrUrGrUrUrUrUrG                   | Substitutes 18 RNA nucleotides with DNA nucleotides at 5' end of guide sequence |
| GFP-20DNA          | GGGCGAGGAGCTGTTCACCGrGrUrUrUrUrArGrArGrCrUrArUrGrCrUrGrUrUrUrUrUrG                   | Substitutes 20 RNA nucleotides with DNA nucleotides at 5' end of guide sequence |
| EMX1-Native Strand | rGrArGrUrCrCrGrArGrCrArGrArArGrArArGrArArGrUrUrUrUrArGrArGrCrUrArUrGrCrUrGrUrUrUrUrG | crRNA without any modifications                                                 |
| EMX1-2DNA          | GArGrUrCrCrGrArGrCrArGrArArGrArArGrArArGrUrUrUrUrArGrArGrCrUrArUrGrCrUrGrUrUrUrUrG   | Substitutes 2 RNA nucleotides with DNA nucleotides at 5' end of guide sequence  |
| EMX1-4DNA          | GAGTrCrCrGrArGrCrArGrArArGrArArGrArArGrUrUrUrUrArGrArGrCrUrArUrGrCrUrGrUrUrUrUrG     | Substitutes 4 RNA nucleotides with DNA nucleotides at 5' end of guide sequence  |
| EMX1-6DNA          | GAGTCCrGrArGrCrArGrArArGrArArGrArArGrArGrUrUrUrUrArGrArGrCrUrArUrGrCrUrGrUrUrUrUrG   | Substitutes 6 RNA nucleotides with DNA nucleotides at 5' end of guide sequence  |
| EMX1-8DNA          | GAGTCCGArGrCrArGrArArGrArArGrArArGrArArGrUrUrUrUrArGrArGrCrUrArUrGrCrUrGrUrUrUrUrG   | Substitutes 8 RNA nucleotides with DNA nucleotides at 5' end of guide sequence  |
| EMX1-10DNA         | GAGTCCGAGCrArGrArArGrArArGrArArGrArArGrUrUrUrUrArGrArGrCrUrArUrGrCrUrGrUrUrUrUrG     | Substitutes 10 RNA nucleotides with DNA nucleotides at 5' end of guide sequence |
| EMX1-12DNA         | GAGTCCGAGCAGrArArGrArArGrArArGrArArGrUrUrUrUrArGrArGrCrUrArUrGrCrUrGrUrUrUrUrG       | Substitutes 12 RNA nucleotides with DNA nucleotides at 5' end of guide sequence |
| EMX1-14DNA         | GAGTCCGAGCAGAArGrArArGrArArGrUrUrUrUrArGrArGrCrUrArUrGrCrUrGrUrUrUrUrG               | Substitutes 14 RNA nucleotides with DNA nucleotides at 5' end of guide sequence |
| EMX1-16DNA         | GAGTCCGAGCAGAAGArArGrArArGrUrUrUrUrArGrArGrCrUrArUrGrCrUrGrUrUrUrUrG                 | Substitutes 16 RNA nucleotides with DNA nucleotides at 5' end of guide sequence |
| EMX1-18DNA         | GAGTCCGAGCAGAAGAAGrArArGrUrUrUrUrArGrArGrCrUrArUrGrCrUrGrUrUrUrUrG                   | Substitutes 18 RNA nucleotides with DNA nucleotides at 5' end of guide sequence |

|                     |                                                                                                                                                                                                                                                               |                                                                                 |
|---------------------|---------------------------------------------------------------------------------------------------------------------------------------------------------------------------------------------------------------------------------------------------------------|---------------------------------------------------------------------------------|
| EMX1-20DNA          | GAGTCCGAGCAGAAGAAGAArGrUrUrU<br>rUrArGrArGrCrUrArUrGrCrUrGrUrUrUrU<br>G                                                                                                                                                                                       | Substitutes 20 RNA nucleotides with DNA nucleotides at 5' end of guide sequence |
| tracrRNA            | rArArArCrArGrCrArUrArGrCrArArGrUrUr<br>ArArArArUrArArGrGrCrUrArGrUrCrCrGrU<br>rUrArUrCrArArCrUrUrGrArArArArGrUr<br>GrGrCrArCrCrGrArGrUrCrGrGrUrGrCrUr<br>UrUrUrUrUrU                                                                                          | tracrRNA without any modification                                               |
| GFP-4DNA at 3' end  | rGrGrGrCrGrArGrGrArGrCrUrGrUrUrCAC<br>CGrGrUrUrUrUrArGrArGrCrUrArUrGrCrU<br>rGrUrUrUrUg                                                                                                                                                                       | Substitutes 4 RNA nucleotides with DNA nucleotides at 3' end of guide sequence  |
| VEGFA-Native Strand | rGrArCrCrCrCrCrUrCrCrArCrCrCrCrGrCr<br>CrUrCrGrUrUrUrUrArGrArGrCrUrArUrGr<br>CrUrGrUrUrUrUg                                                                                                                                                                   | crRNA without any modifications                                                 |
| VEGFA-10DNA         | GACCCCTCCrArCrCrCrGrCrCrUrCr<br>GrUrUrUrUrArGrArGrCrUrArUrGrCrUrGr<br>UrUrUrUg                                                                                                                                                                                | Substitutes 10 RNA nucleotides with DNA nucleotides at 5' end of guide sequence |
| GFP sgRNA           | rGrGrG rCrGrA rGrGrA rGrCrU rGrUrU<br>rCrArC rCrGrG rUrUrU rUrArG rArGrC<br>rUrArG rArArA rUrArG rCrArA rGrUrU<br>rArArA rArUrA rArGrG rCrUrA rGrUrC<br>rCrGrU rUrArU rCrArA rCrUrU rGrArA<br>rArArA rGrUrG rGrCrA rCrCrG rArGrU<br>rCrGrG rUrGrC rUrUrU rUrU | GFP-targeting sgRNA without any modifications                                   |
| GFP sgRNA-8D        | GGG CGA GGrA rGrCrU rGrUrU rCrArC<br>rCrGrG rUrUrU rUrArG rArGrC rUrArG<br>rArArA rUrArG rCrArA rGrUrU rArArA<br>rArUrA rArGrG rCrUrA rGrUrC rCrGrU<br>rUrArU rCrArA rCrUrU rGrArA rArArA<br>rGrUrG rGrCrA rCrCrG rArGrU rCrGrG<br>rUrGrC rUrUrU rUrU         | Substitutes 8 RNA nucleotides with DNA nucleotides at 5' end of guide sequence  |
| EMX1 sgRNA          | rGrArGrUrCrCrGrArGrCrArGrArArGrArAr<br>GrArArG rUrUrU rUrArG rArGrC rUrArG<br>rArArA rUrArG rCrArA rGrUrU rArArA<br>rArUrA rArGrG rCrUrA rGrUrC rCrGrU<br>rUrArU rCrArA rCrUrU rGrArA rArArA<br>rGrUrG rGrCrA rCrCrG rArGrU rCrGrG<br>rUrGrC rUrUrU rUrU      | EMX1-targeting sgRNA without any modifications                                  |
| EMX1 sgRNA-8D       | GAGTCCGArGrCrArGrArArGrArArGrArAr<br>G rUrUrU rUrArG rArGrC rUrArG rArArA                                                                                                                                                                                     | Substitutes 8 RNA nucleotides with DNA nucleotides at the 5' end of             |

|                   |                                                                                                                                                                                                                                                          |                                                                                                                                            |
|-------------------|----------------------------------------------------------------------------------------------------------------------------------------------------------------------------------------------------------------------------------------------------------|--------------------------------------------------------------------------------------------------------------------------------------------|
|                   | rUrArG rCrArA rGrUrU rArArA rArUrA<br>rArGrG rCrUrA rGrUrC rCrGrU rUrArU<br>rCrArA rCrUrU rGrArA rArArA rGrUrG<br>rGrCrA rCrCrG rArGrU rCrGrG rUrGrC<br>rUrUrU rUrU                                                                                      | guide sequence                                                                                                                             |
| VEGFA sgRNA       | rGrArCrCrCrCrCrUrCrCrArCrCrCrCrGrCr<br>CrUrCrG rUrUrU rUrArG rArGrC rUrArG<br>rArArA rUrArG rCrArA rGrUrU rArArA<br>rArUrA rArGrG rCrUrA rGrUrC rCrGrU<br>rUrArU rCrArA rCrUrU rGrArA rArArA<br>rGrUrG rGrCrA rCrCrG rArGrU rCrGrG<br>rUrGrC rUrUrU rUrU | VEGFA-targeting sgRNA without modifications                                                                                                |
| VEGFA sgRNA-8D    | GACCCCTrCrCrArCrCrCrCrGrCrCrUrC<br>rG rUrUrU rUrArG rArGrC rUrArG rArArA<br>rUrArG rCrArA rGrUrU rArArA rArUrA<br>rArGrG rCrUrA rGrUrC rCrGrU rUrArU<br>rCrArA rCrUrU rGrArA rArArA rGrUrG<br>rGrCrA rCrCrG rArGrU rCrGrG rUrGrC<br>rUrUrU rUrU          | Substitutes 8 RNA nucleotides with DNA nucleotides at 5' end of guide sequence                                                             |
| RNA mut           | GGGCGAGGrUrCrGrArGrUrUrCrArCrCr<br>GrGrUrUrUrUrArGrArGrCrUrArUrGrCrUr<br>GrUrUrUrUrG                                                                                                                                                                     | Substitutes 8 RNA nucleotides with DNA nucleotides at 5' end of guide sequence, and mutates 4 RNA nucleotides (position 9-12 from 5' end). |
| DNA mut-1         | GGGCCTCCrArGrCrUrGrUrUrCrArCrCrG<br>rGrUrUrUrUrArGrArGrCrUrArUrGrCrUrGr<br>UrUrUrUrG                                                                                                                                                                     | Substitutes 8 RNA nucleotides with DNA nucleotides at 5' end of guide sequence, and mutates 4 DNA nucleotides (position 5-8 from 5' end).  |
| DNA mut-2         | CCCGGAGGrArGrCrUrGrUrUrCrArCrCr<br>GrGrUrUrUrUrArGrArGrCrUrArUrGrCrUr<br>GrUrUrUrUrG                                                                                                                                                                     | Substitutes 8 RNA nucleotides with DNA nucleotides at 5' end of guide sequence, and mutates 4 DNA nucleotides (position 1-4 from 5' end).  |
| GFP2 Native crRNA | rGrGrGrCrArCrGrGrGrCrArGrCrUrUrGrCr<br>CrGrGrGrUrUrUrUrArGrArGrCrUrArUrGr<br>CrUrGrUrUrUrG                                                                                                                                                               | crRNA without any modifications                                                                                                            |
| GFP2 RNA-mut 1    | rGrGrGrCrArCrGrGrGrCrArGrCrUrUrGrG<br>rCrGrGrGrUrUrUrUrArGrArGrCrUrArUrGr<br>CrUrGrUrUrUrG                                                                                                                                                               | crRNA without any modifications and with 1 nt mismatch mutation at the seed region                                                         |

|                      |                                                                                                          |                                                                                                                                 |
|----------------------|----------------------------------------------------------------------------------------------------------|---------------------------------------------------------------------------------------------------------------------------------|
| GFP2 RNA-mut 2       | rGrGrGrCrArCrGrGrCrCrArGrCrUrUrGrCr<br>CrGrGrGrUrUrUrUrArGrArGrCrUrArUrGr<br>CrUrGrUrUrUrG               | crRNA without modifications and with 1 nt mismatch mutation at the tail region                                                  |
| GFP2 10DNA           | GGGCACGGGCrArGrCrUrUrGrCrCrGrG<br>rGrUrUrUrUrArGrArGrCrUrArUrGrCrUrGr<br>UrUrUrUrG                       | Substitutes 10 RNA nucleotides with DNA nucleotides at 5' end of guide sequence                                                 |
| GFP2 10DNA-mut 1     | GGGCACGGGCrArGrCrUrUrGrGrCrGrG<br>rGrUrUrUrUrArGrArGrCrUrArUrGrCrUrGr<br>UrUrUrUrG                       | Substitutes 10 RNA nucleotides with DNA nucleotides at 5' end of guide sequence; with 1 nt mismatch mutation at the seed region |
| GFP2 10DNA-mut 2     | GGGCACGGCCrArGrCrUrUrGrCrCrGrG<br>rGrUrUrUrUrArGrArGrCrUrArUrGrCrUrGr<br>UrUrUrUrG                       | Substitutes 10 RNA nucleotides with DNA nucleotides at 5' end of guide sequence; with 1 nt mismatch mutation at the tail region |
| Mus Pcsk9-2-crRNA    | rGrCrU rCrGrC rCrCrU rCrCrC rGrUrC<br>rCrCrA rGrG rG rUrUrU rUrArG rArGrC<br>rUrArU rGrCrU rGrUrU rUrUrG | crRNA without any modifications                                                                                                 |
| Mus Pcsk9-2-10DNA    | GCT CGC CCT CrCrC rGrUrC rCrCrA<br>rGrG rG rUrUrU rUrArG rArGrC rUrArU<br>rGrCrU rGrUrU rUrUrG           | Substitutes 10 RNA nucleotides with DNA nucleotides at 5' end of guide sequence                                                 |
| 293 site 4-crRNA     | rGrGrC rArCrU rGrCrG rGrCrU rGrGrA<br>rGrGrU rGrG rG rUrUrU rUrArG rArGrC<br>rUrArU rGrCrU rGrUrU rUrUrG | crRNA without any modifications                                                                                                 |
| 293 site 4-10DNA     | GGC ACT GCG GrCrU rGrGrA rGrGrU<br>rGrG rG rUrUrU rUrArG rArGrC rUrArU<br>rGrCrU rGrUrU rUrUrG           | Substitutes 10 RNA nucleotides with DNA nucleotides at 5' end of guide sequence                                                 |
| GFP 3nt DNA mismatch | GGGC GTCC<br>rArGrCrUrGrUrUrCrArCrCrGrGrUrUrUrUr<br>ArGrArGrCrUrArUrGrCrUrGrUrUrUrUrG                    | Substitutes 8 RNA nucleotides with DNA nucleotides at 5' end of guide sequence; with 3 nt mismatch mutation at the seed region  |
| GFP 3nt RNA mismatch | rGrGrGrC rGrUrCrC<br>rArGrCrUrGrUrUrCrArCrCrGrGrUrUrUrUr<br>ArGrArGrCrUrArUrGrCrUrGrUrUrUrUrG            | crRNA without modifications and with 3 nt mismatch mutation at the tail region                                                  |
| GFP 2nt DNA mismatch | GGGC<br>GACCrArGrCrUrGrUrUrCrArCrCrGrGrUr<br>UrUrUrArGrArGrCrUrArUrGrCrUrGrUrUr<br>UrUrG                 | Substitutes 8 RNA nucleotides with DNA nucleotides at 5' end of guide sequence; with 2 nt mismatch mutation at the seed region  |
| GFP 2nt RNA mismatch | rGrGrGrC rGrArCrC<br>rArGrCrUrGrUrUrCrArCrCrGrGrUrUrUrUr                                                 | crRNA without modifications and with 2 nt mismatch mutation at the                                                              |

|                      |                                                                                                                                                                                                                                                     |                                                                                                                                |
|----------------------|-----------------------------------------------------------------------------------------------------------------------------------------------------------------------------------------------------------------------------------------------------|--------------------------------------------------------------------------------------------------------------------------------|
|                      | ArGrArGrCrUrArUrGrCrUrGrUrUrUrUrG                                                                                                                                                                                                                   | tail region                                                                                                                    |
| GFP 1nt DNA mismatch | GGGC GAGC<br>rArGrCrUrGrUrUrCrArCrCrGrGrUrUrUrUr<br>ArGrArGrCrUrArUrGrCrUrGrUrUrUrUrG                                                                                                                                                               | Substitutes 8 RNA nucleotides with DNA nucleotides at 5' end of guide sequence; with 1 nt mismatch mutation at the seed region |
| GFP 1nt RNA mismatch | rGrGrGrC rGrArGrC<br>rArGrCrUrGrUrUrCrArCrCrGrGrUrUrUrUr<br>ArGrArGrCrUrArUrGrCrUrGrUrUrUrUrGr<br>UrG                                                                                                                                               | crRNA without modifications and with 1 nt mismatch mutation at the tail region                                                 |
| GFP-sg10D            | GGG CGA GGA GrCrU rGrUrU rCrArC<br>rCrGrG rUrUrU rUrArG rArGrC rUrArG<br>rArArA rUrArG rCrArA rGrUrU rArArA<br>rArUrA rArGrG rCrUrA rGrUrC rCrGrU<br>rUrArU rCrArA rCrUrU rGrArA rArArA<br>rGrUrG rGrCrA rCrCrG rArGrU rCrGrG<br>rUrGrC rUrUrU rUrU | Substitutes 10 RNA nucleotides with DNA nucleotides at 5' end of guide sequence of sgRNA                                       |
| EMX-sg10D            | GAGTCCGAGCrArGrArArGrArArGrArAr<br>G rUrUrU rUrArG rArGrC rUrArG rArArA<br>rUrArG rCrArA rGrUrU rArArA rArUrA<br>rArGrG rCrUrA rGrUrC rCrGrU rUrArU<br>rCrArA rCrUrU rGrArA rArArA rGrUrG<br>rGrCrA rCrCrG rArGrU rCrGrG rUrGrC<br>rUrUrU rUrU      | Substitutes 10 RNA nucleotides with DNA nucleotides at 5' end of guide sequence of sgRNA                                       |
| VEGFA-sg10D          | GACCCCTCCrArCrCrCrGrCrCrUrCr<br>G rUrUrU rUrArG rArGrC rUrArG rArArA<br>rUrArG rCrArA rGrUrU rArArA rArUrA<br>rArGrG rCrUrA rGrUrC rCrGrU rUrArU<br>rCrArA rCrUrU rGrArA rArArA rGrUrG<br>rGrCrA rCrCrG rArGrU rCrGrG rUrGrC<br>rUrUrU rUrU         | Substitutes 10 RNA nucleotides with DNA nucleotides at 5' end of guide sequence of sgRNA                                       |
| 22 DNA-3'            | rGrGrGrCrGrArGrGrArGrCrUrGrUrUrCrAr<br>CrCrGGTTTTAGAGCTATGCTGTTTTG                                                                                                                                                                                  | Substitutes 22 RNA nucleotides with DNA nucleotides at 3' end of crRNA                                                         |
| 16 DNA-3'            | rGrGrGrCrGrArGrGrArGrCrUrGrUrUrCrAr<br>CrCrGGUrUrUrUrArGAGCTATGCTGTT<br>TTG                                                                                                                                                                         | Substitutes 16 RNA nucleotides with DNA nucleotides at 3' end of guide sequence of crRNA                                       |
| 8DNA16DNA            | GGGCGAGGrArGrCrUrGrUrUrCrArCrCr<br>GGUrUrUrUrArGAGCTATGCTGTTTTG                                                                                                                                                                                     | Substitutes 8 RNA nucleotides with DNA nucleotides at 5' end 16 RNA nucleotides with DNA nucleotides at 3' end of crRNA        |

|             |                                                                                       |                                                                                                |
|-------------|---------------------------------------------------------------------------------------|------------------------------------------------------------------------------------------------|
| Ascpf1      | rUrArArUrUrUrCrUrArCrUrCrUrUrGrUrArGrArUrCrUrGrArUrGrGrUrCrCrArUrGrUrCrUrGrUrUrArCrUC | Ascpf1 crRNA without modifications                                                             |
| 8DNA-Ascpf1 | rUrArArUrUrUrCrUrArCrUrCrUrUrGrUrArGrArUrCrUrGrArUrGrGrUrCrCrArUrGrUrCTGTACTC         | Substitutes 8 RNA nucleotides with DNA nucleotides at 3' end of guide sequence of Ascpf1 crRNA |

**Supplementary Table 2. Primer sequences.**

| ID               | Sequence (5' ->3')         | Notes                   |
|------------------|----------------------------|-------------------------|
| EF1a-F           | TCAAGCCTCAGACAGTGGTTC      | GFP PCR primers         |
| GFP-R            | TCCTTGAAGTCGATGCCCTT       |                         |
| VEGFA_For        | AGAGAAGTCGAGGAAGAGAGAG     | VEGFA PCR Primers       |
| VEGFA _Rev       | CAGCAGAAAAGTTCATGGTTTCG    |                         |
| VEGFA_OFF_1_For  | CAAGATGTGCACTTGGGCTA       | VEGFA Off target site 1 |
| VEGFA _OFF_1_Rev | GCAGCCTATTGTCTCCTGGT       |                         |
| VEGFA _OFF_2_For | CCAGGTGGTGTACGCGGAGG       | VEGFA Off target site 2 |
| VEGFA _OFF_2_Rev | TGCCTGGCCCTCTCTGAGTCT      |                         |
| VEGFA _OFF_3_For | TGCTGCAGGTGGTTCCGGAG       | VEGFA Off target site 3 |
| VEGFA _OFF_3_Rev | CTGGAACCGCATCCTCCGCA       |                         |
| Sp-EMX1-F2       | CCATCCCCTTCTGTGAATGT       | EMX1 PCR Primers        |
| Sp-EMX1-R2       | GGAGATTGGAGACACGGAGA       |                         |
| 293-site4F       | GAGACCTGCTGAGGGCGGCTTCTCCC | 293 site4 PCR primers   |
| 293-site4 seq    | AGTCAGTCCATGCCTGCAGGGTC    |                         |
| 293-site4R       | CCCACTGTAGTCACACAGCACCAGAG |                         |
| Pcsk9_For        | ATCACCCCAACCCCAAAGCA       | Pcsk9 PCR primers       |
| Pcsk9_Rev        | CCAGGCGTCCATGTCTTCC        |                         |

## Supplementary Figure 1

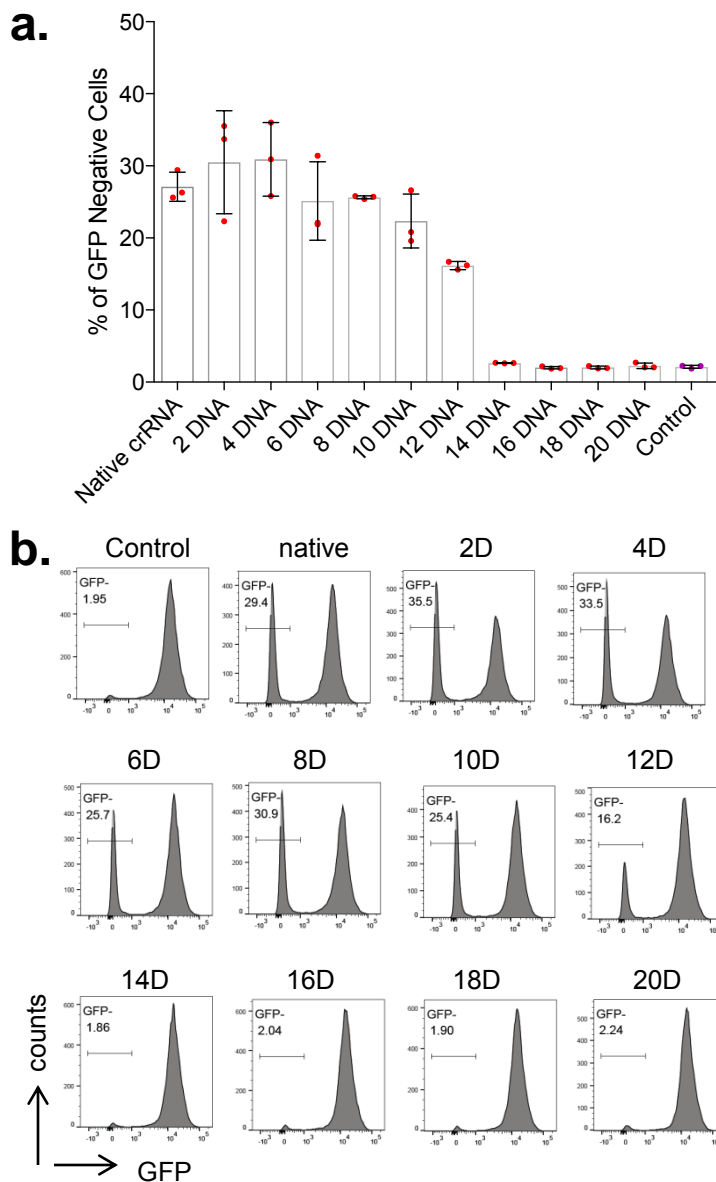

**Supplementary Figure 1. Partial DNA replacement at the 5' end of guide sequence of a crRNA induced gene editing in human cells.** HEK293T cells stably expressing both EFs promoter-*SpCas9* and EF1a promoter-GFP were transfected with a crRNA targeting GFP and tracrRNA. (a) Percentage of GFP negative cells determined by FACS analysis.  $n=3$  biologically independent samples. Error bars, mean  $\pm$  s.d.. (b) Representative FACS plots.



## Supplementary Figure 2

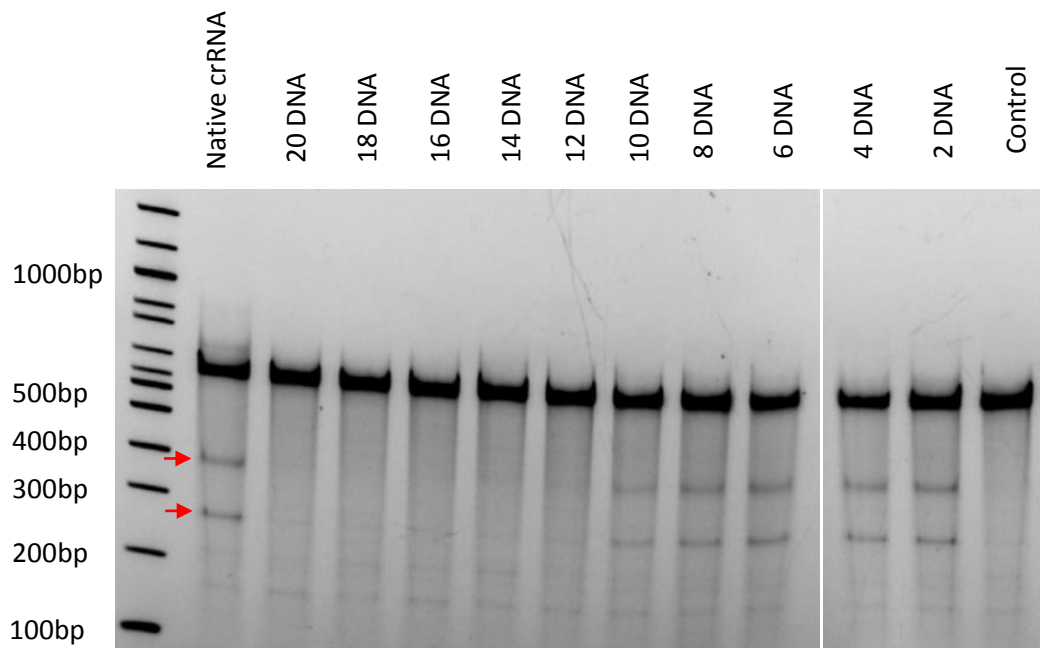

**Supplementary Figure 2. Partial DNA replacement at the 5' end of guide sequence of a crRNA targeting EMX1 induced indels in human cells.** HEK293T cells stably expressing *SpCas9* were transfected with tracrRNA and an EMX1-targeting crRNA. Surveyor assay were performed to determine indels at EMX1 locus. Red arrowheads indicate surveyor nuclease cleaved fragments of the EMX1 PCR product. These experiments were repeated three times independently with similar results.

## Supplementary Figure 3

**a**

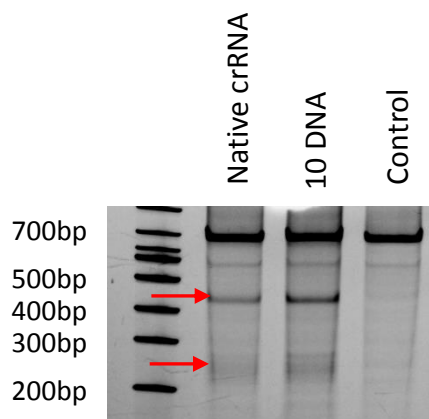

**b**

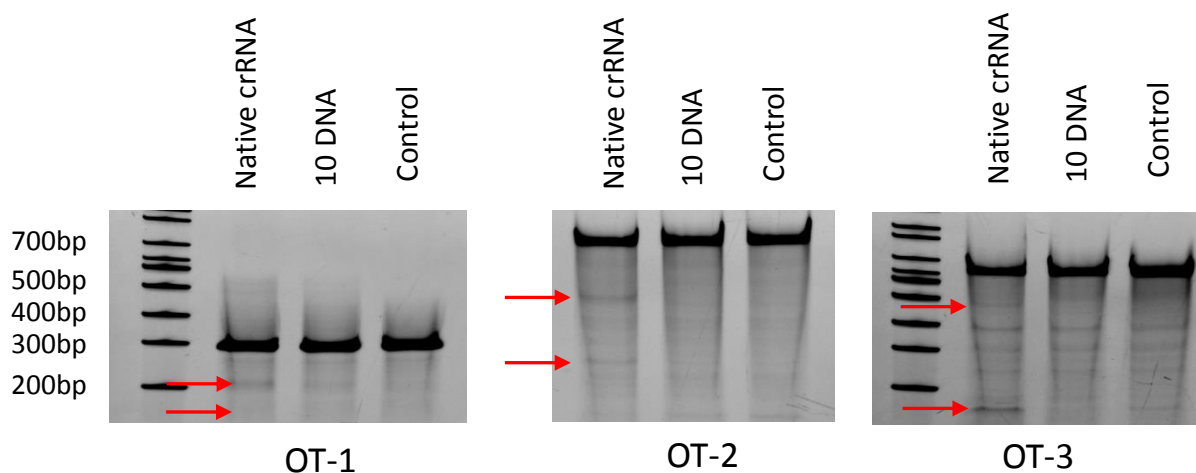

**Supplementary Figure 3. Partial DNA replacement at the 5' end of guide sequence of a crRNA targeting VEGFA efficiently reduced off-target activity in human cells.** Surveyor assay were performed to determine indels at a) VEGFA locus and b) 3 top off-target sites of VEGFA guide sequence. Red arrowheads indicate surveyor nuclease cleaved fragments of PCR products of the VEGFA or off-target sites. These experiments were repeated three times independently with similar results.

## Supplementary Figure 4

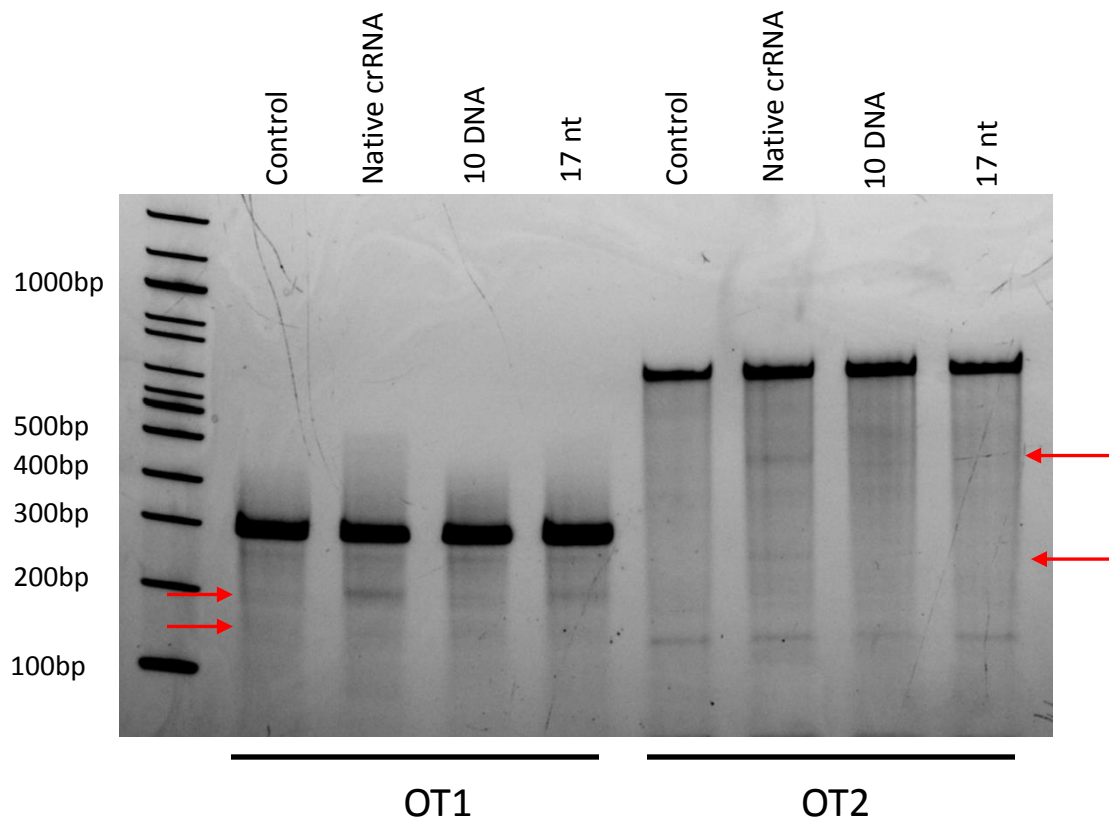

**Supplementary Figure 4. Partial DNA replacement at the 5' end of guide sequence of a crRNA or truncated crRNA targeting VEGFA efficiently reduced off-target activity in human cells.** Surveyor assay was performed to determine indels at 2 top off-target sites of VEGFA guide sequence. Red arrowheads indicate surveyor nuclease cleaved fragments of PCR products of the off-target sites. These experiments were repeated three times independently with similar results.

## Supplementary Figure 5

**a**

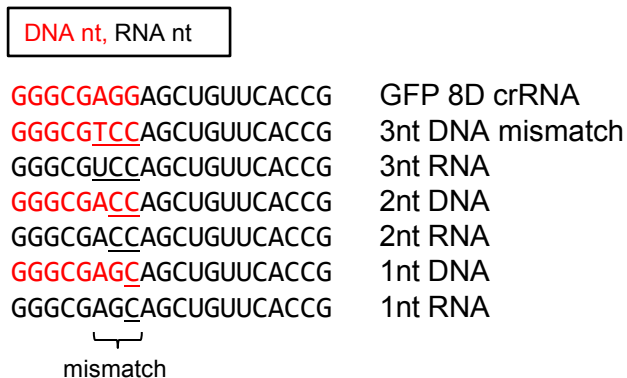

**b**

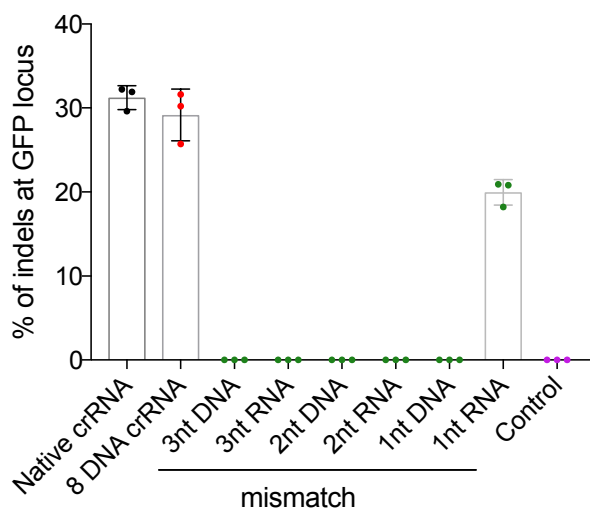

**Supplementary Figure 5. Native crRNA, but not the 8 DNA crRNA, tolerates single nucleotide mismatch.** (a) Illustration of DNA replacement and mismatches at the 20 nt guide region of GFP crRNAs. RNA, DNA, and mismatch are shown in black, red and underlined, respectively. (b) HEK293T-GFP-SpCas9 cells were transfected with tracrRNA and crRNAs in (a). TIDE analysis was performed at day 3 to calculate the % of indel at GFP locus. n=3 biologically independent samples. Error bars, mean ± s.d.

## Supplementary Figure 6

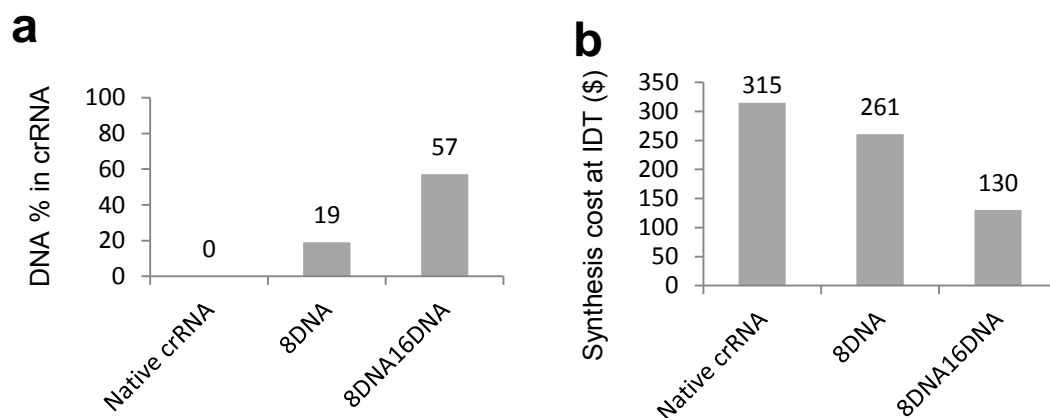

**Supplementary Figure 6. An optimized DNA-RNA chimeric crRNA enables efficient genome editing in human cells and significantly reduces cost. (a)** DNA % in crRNA design in Fig. 4a. **(b)** 8DNA16DNA significantly reduces synthesis cost. Cost shown is for 100nMole custom RNA or DNA-RNA chimeric oligos ordered from IDT.

**Supplementary Data Set 1 Details of GUIDE-Seq analysis of native and 10 DNA crRNAs of three endogenous genes (Excel file)**

GUIDE-Seq analysis of native and 10 DNA crRNAs targeting mouse *Pcsk9*, and human EMX1 and 293 site 4 was performed using Hepa1-6 cells and HEK293T cells, respectively. The information of the on-target and off-target sites, including location, peak scores, off-target sequence, details of mismatches, etc was showed in the tables. Off target sites for native crRNA and 10D are shown in black or blue, respectively. Each tab in the excel file is one gene locus. The full table shows off-target sites allowing up to 6 mismatches in the guide and 2 in the PAM. Sites with more than 6 mismatches total between the guide and PAM (the threshold defined by the Joung laboratory) are shown in grey. These sites were excluded from our analysis.
